# Supplementary material
Source: publisher figshare collection journal article supplement (https://acs.figshare.com/ndownloader/files/3626445)
Supplement: Supplementary file 1 [file 3626445]

# **Restoring light sensitivity in blind retinae using a photochromic AMPA receptor agonist**

Laprell L<sup>1#</sup>, Hüll K<sup>1</sup>, Stawski P<sup>1</sup>, Schoen C<sup>2</sup>, Michalakis S<sup>2</sup>, Biel M<sup>2</sup>, Sumser MP<sup>1</sup>, Trauner D<sup>1\*</sup>

<sup>1</sup> Center of Integrated Protein Science Munich (CIPSM) at the Department of Chemistry Ludwig-Maximilians-Universität München, Munich 81377, Germany

<sup>2</sup> Center for Integrated Protein Science Munich (CIPSM) at the Department of Pharmacy - Center for Drug Research, Ludwig-Maximilians-Universität München, Munich 81377, Germany

#International Max Planck Research School for Molecular and Cellular Life Sciences (IMPRS-LS)

\*Author for correspondence (dirk.trauner@lmu.de)

## **Supporting Information**

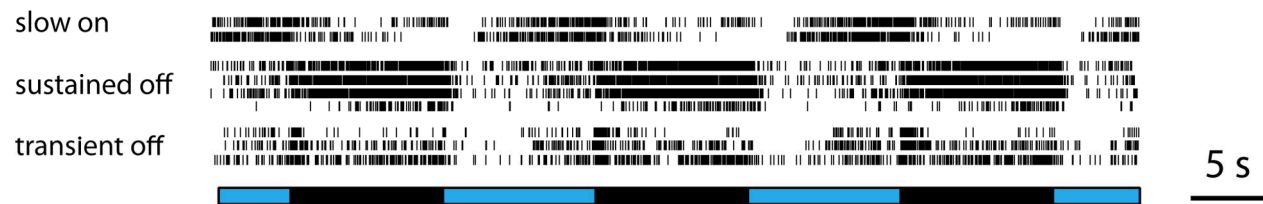

**SI Figure 1 - ATA induces different light responses on single cell level.** Raster plot of example RGCs showing slow on-light responses, sustained and transient off-light responses. The bar underneath the raster plot indicates the light stimulation protocol.

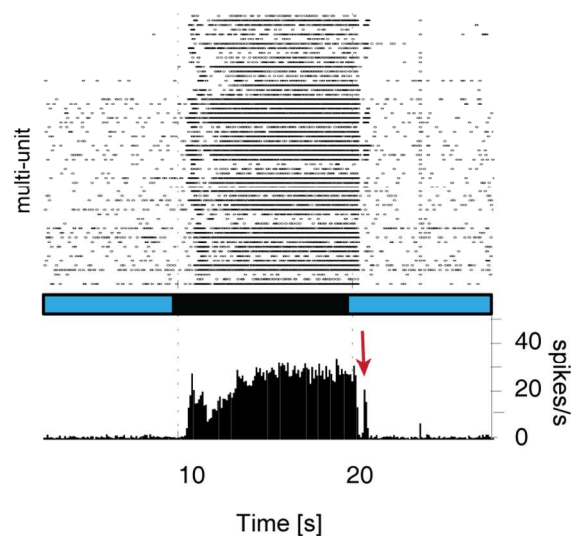

**SI Figure 2 - ATA-mediated light responses show a small transient light-on response in presence of  $\text{CdCl}_2$ .** Raster plot and histogram of MEA recording of ATA-treated TKO retina in presence of 500uM  $\text{CdCl}_2$ . Red arrow indicates transient light on-response seen in a few experiments performed in presence of  $\text{CdCl}_2$ .

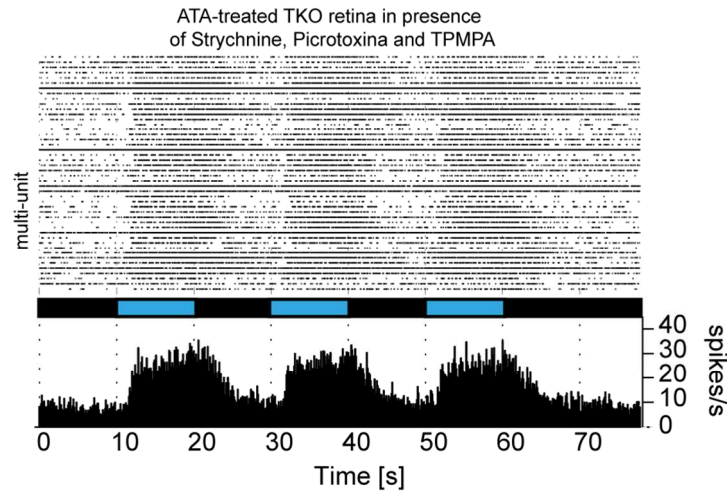

**SI Figure 3 - ATA -mediated light responses invert in presence of picrotoxin, strychnine and TPMPA.** Raster plot and histogram of MEA recording of ATA-treated TKO retina in presence of strychnine (1  $\mu$ M), picrotoxine (5  $\mu$ M) and TPMPA (10  $\mu$ M)

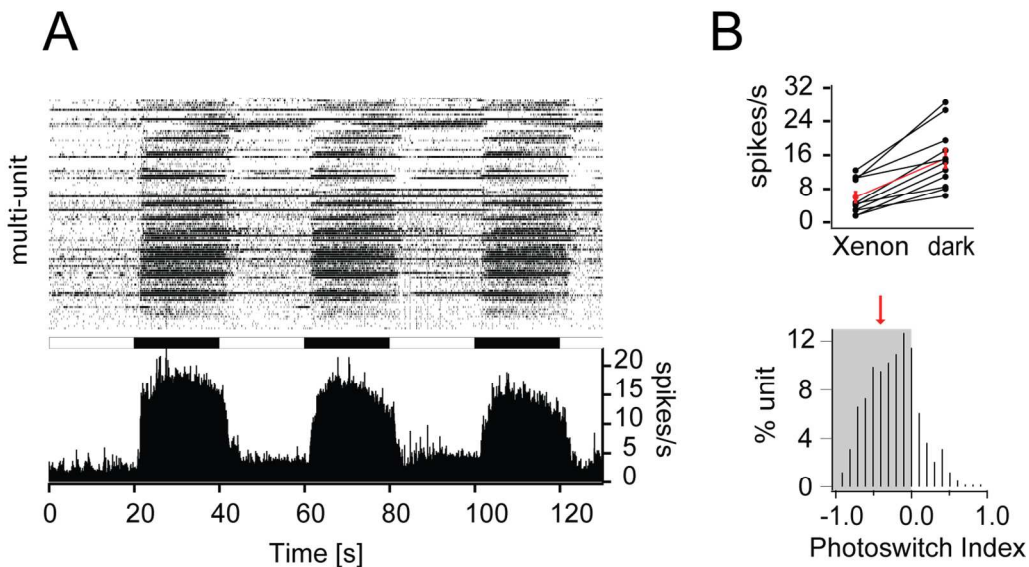

**SI Figure 4 - ATA responses under white light illumination. (A)** Raster plot and histogram of MEA recording of ATA-treated TKO retina with Xenon light stimulation. **(B)** Statistics of light responses in ATA-treated TKO retinæ. (Top) Average spiking rate in darkness and with Xenon light (n=11 retinæ,  $p < 0.01$ ). (Bottom) Distribution of photoswitch index for RGC populations (n=577 cells). The red arrow indicates the mean photoswitch index for all recorded cells (Photoswitch Index =  $-0.38 \pm 0.038$ ).

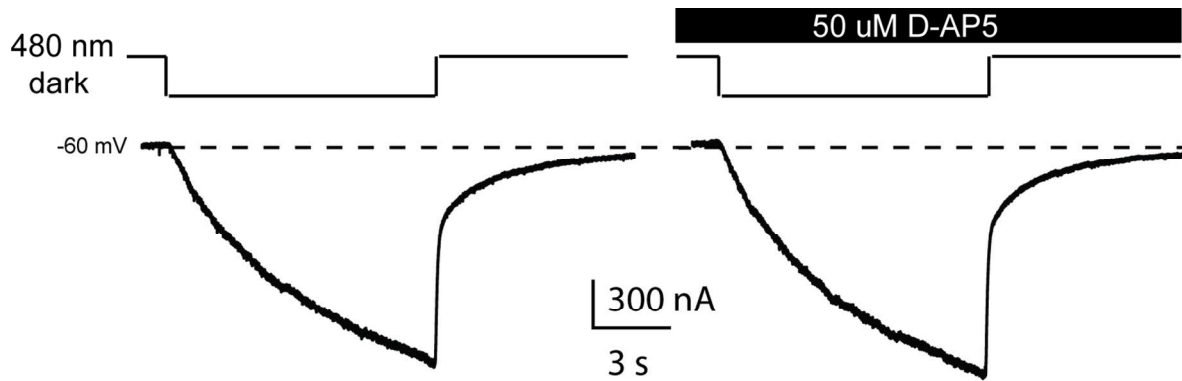

**SI Figure 5 - Application of ATA in hippocampal neurons of acute murine brain slices.** Example traces of ATA-application (25  $\mu$ M). During illumination with 480 nm light, ATA has no effect on membrane currents. After turning light off large light-induced currents are recorded ( $> 1 \mu$ A), which were insensitive to the selective NMDA receptor antagonist D-AP5 (50  $\mu$ M).

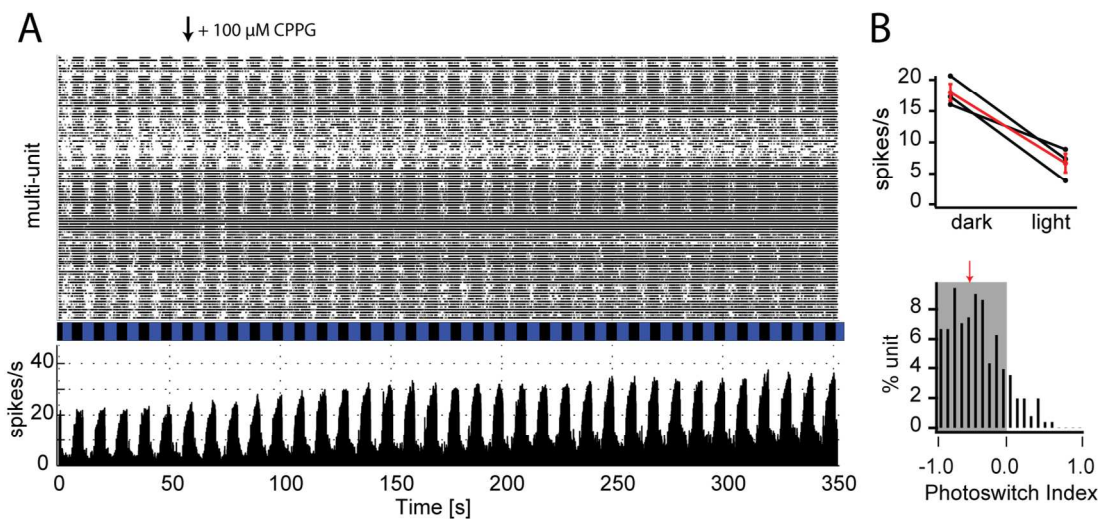

**SI Figure 6 - ATA responses in presence of CPPG.** (A) Raster plot and histogram of MEA recording of ATA-treated TKO retina during wash in of 100  $\mu$ M CPPG. (B) Statistics of light responses in ATA-treated TKO retinæ. (Top) Average spiking rate in darkness and with 480 nm light ( $n=3$  retinæ). (Bottom) Distribution of photoswitch index for RGC populations ( $n=255$  cells). The red arrow indicates the mean photoswitch index for all recorded cells (Photoswitch Index =  $-0.54 \pm 0.09$ ).

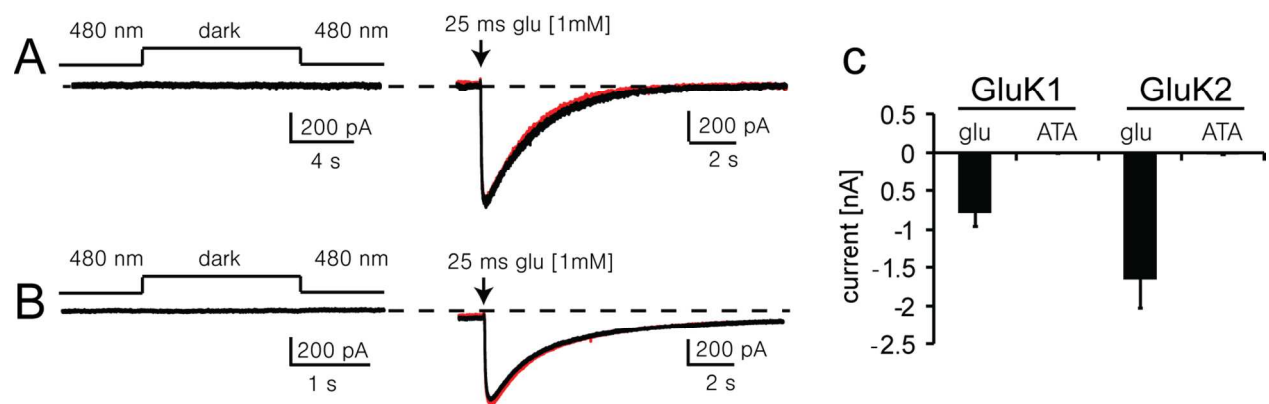

**SI Figure 7 - Heterologous expression of (A) GluK1 and (B) GluK2 in HEK cells.** ATA application (25  $\mu$ M) to HEK cells was not able to induce light-mediated currents through kainate receptors (left). Control of expression level was performed by a 25 ms puff application with 1 mM glutamate (right). Experiments were performed in presence of Concanavalin A (300 mg/ml) to prevent desensitization. In black and in red are two consecutive puff applications shown. (c) Quantification of glutamate- and light-induced currents. Glutamate application result in GluK1-mediated currents of  $-0.79 \pm 0.17$  nA, whereas light-induces currents were negligible ( $0.0024 \pm 0.0027$  nA,  $n=4$  cells). In HEK cells expressing GluK2 glutamate currents were  $-1.66 \pm 0.37$  nA and light-induced currents  $-0.01 \pm 0.01$  (n=5).
